# Supplementary material for: Hetero-nanostructures constructed by 2D porous metal oxide/hydroxide nanosheets supported on 1D hollow Co9S8 nanowires for hybrid supercapacitors with high areal capacity
Source: Royal Society of Chemistry journal article supplement (doi:10.1039/d1qi00814e), 2021-01-01
Supplement: d1qi00814e1.pdf [file d1qi00814e1.pdf]

***Supporting Information:***

**Hetero-Nanostructures Constructed by 2D Porous Metal  
Oxide/Hydroxide Nanosheets Supported on 1D Hollow Co<sub>9</sub>S<sub>8</sub>  
Nanowire for Hybrid Supercapacitors with High Areal Capacity**

Yifan Pan<sup>a</sup>, Jinhe Wei<sup>a</sup>, Dandan Han<sup>\*a</sup>, Qian Xu<sup>a</sup>, Dongyan Gao<sup>a</sup>, Yaobin Yang<sup>a</sup>, Yen  
Wei<sup>\*b</sup>

<sup>a</sup> *College of Chemistry and Pharmaceutical Engineering, Jilin Institute of Chemical  
Technology, Jilin 132022, P. R. China*

<sup>b</sup> *Department of Chemistry and the Tsinghua Center for Frontier Polymer Research,  
Tsinghua University, Beijing, 100084, China*

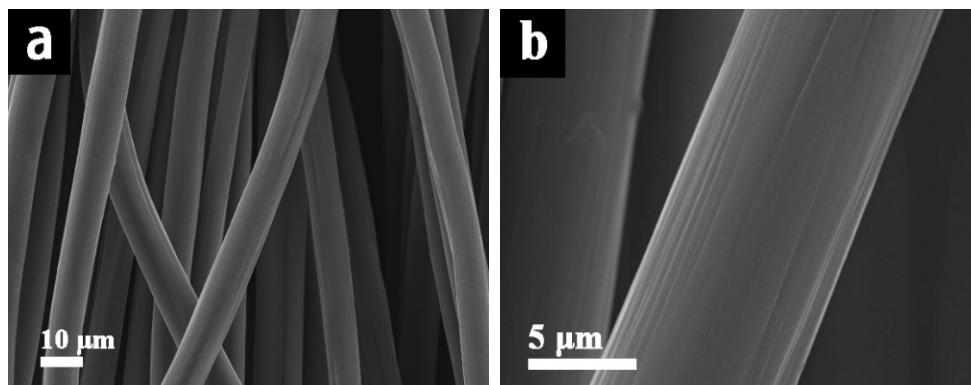

**Figure S1** (a,b) Morphology of the pristine carbon cloth used as a current collector

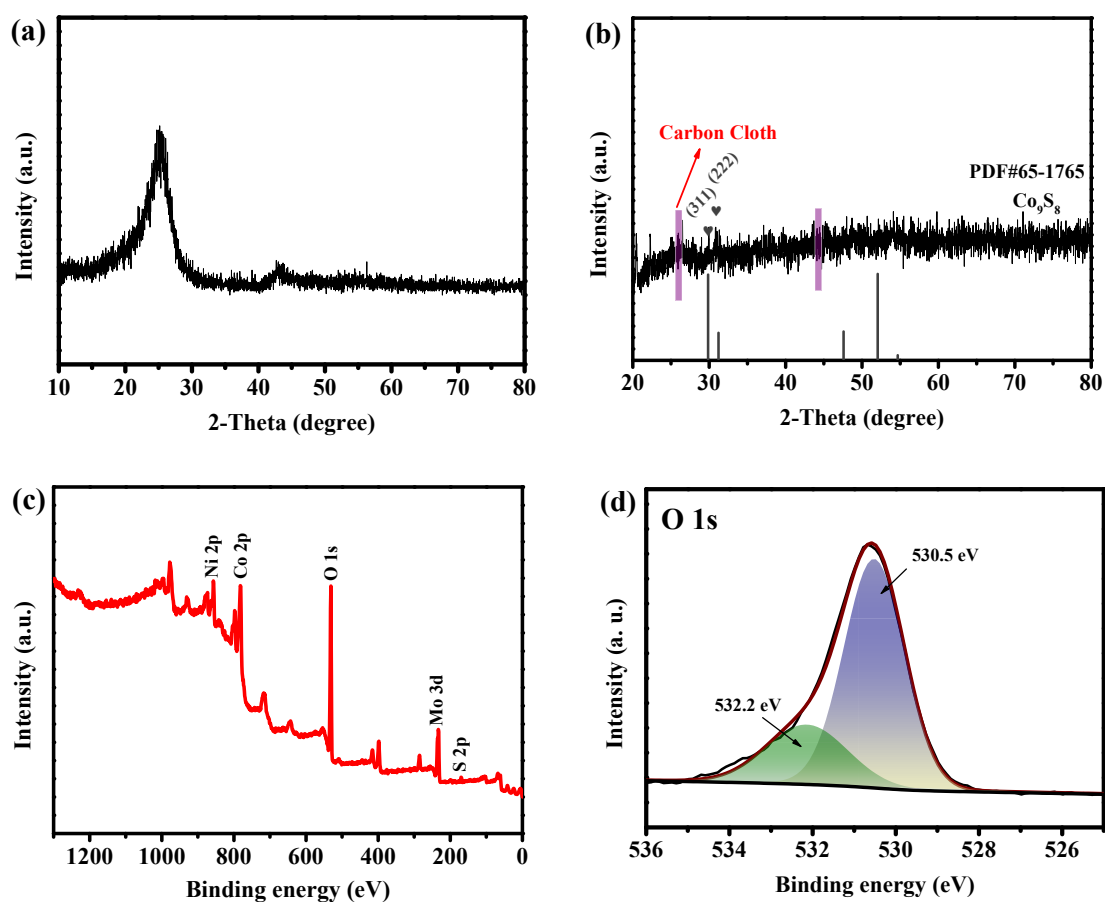

**Figure S2** (a) The XRD patterns of CC. (a) The XRD patterns of h-Co<sub>9</sub>S<sub>8</sub> NWAs. (c) XPS survey spectrum of CC/h-Co<sub>9</sub>S<sub>8</sub>/NiCo-Mo hetero-nanostructures. (d) XPS spectra of the O1s.

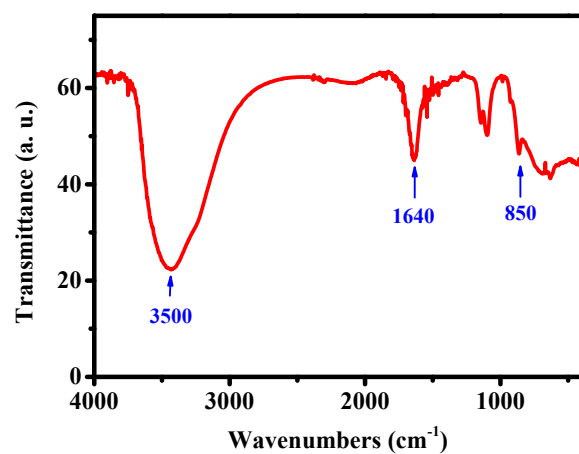

**Figure S3** The FT-IR spectrum of CC/h-Co<sub>9</sub>S<sub>8</sub>/NiCo-Mo hetero-nanostructures.

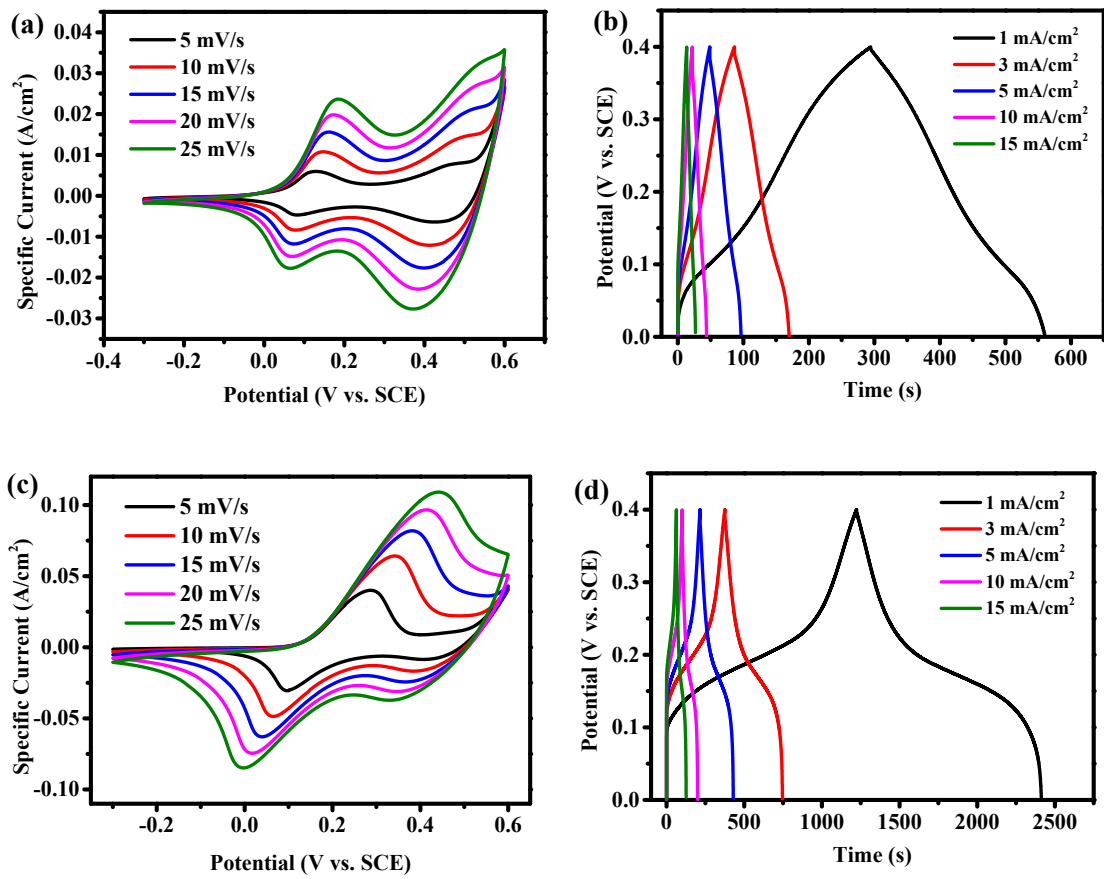

**Figure S4** (a, b) The CV and GCD curves of CC/h-Co<sub>9</sub>S<sub>8</sub> electrode, and (c, d) CC/NiCo-Mo electrode in 2 M KOH.

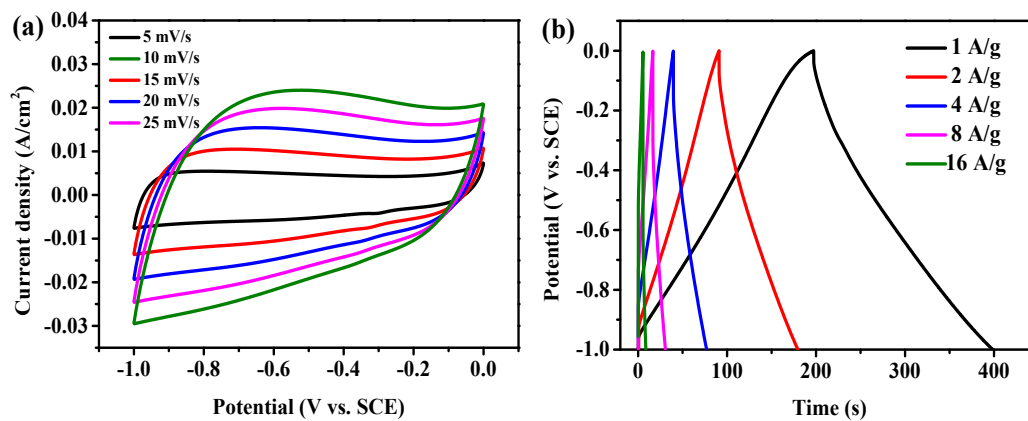

**Figure S5** The electrochemical performance of the CC/AC electrode in 2 M KOH electrolyte: (a) CV curves, (b) GCD curves.

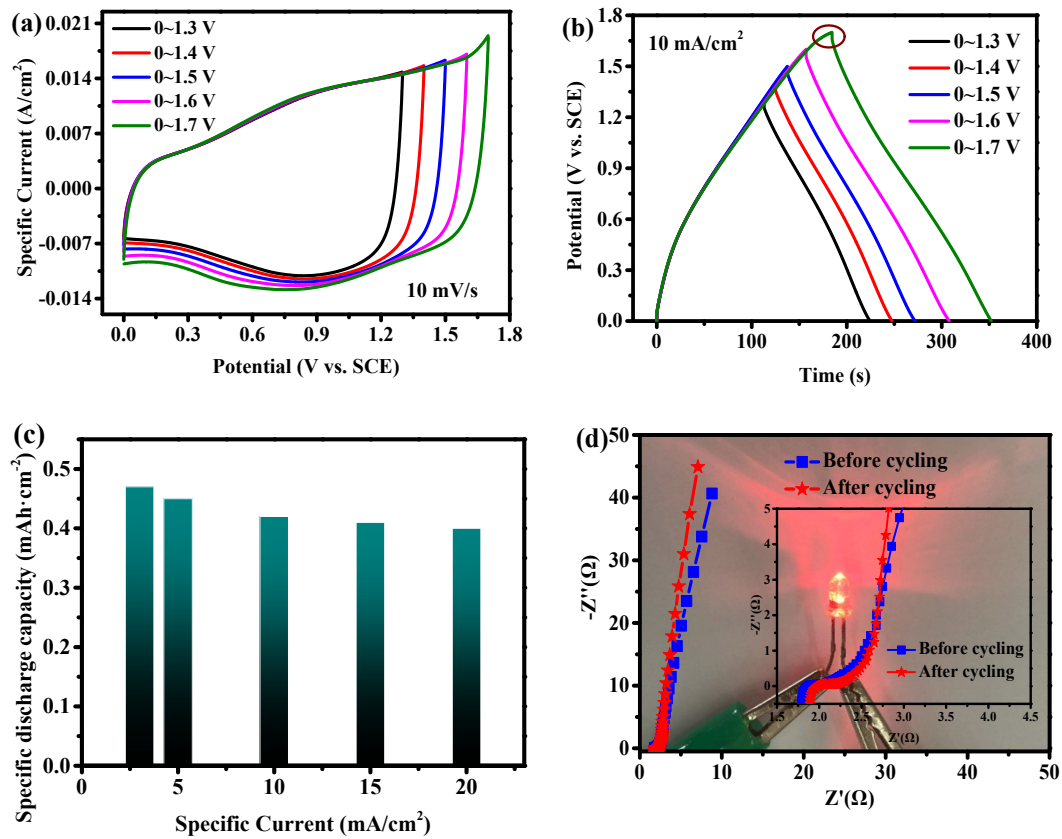

**Figure S6** (a) CV curves of the as-assembled CC/h-Co<sub>9</sub>S<sub>8</sub>/NiCo-Mo//AC HSC device measured at different operating voltages at the scan rate of 10 mV·s<sup>-1</sup>. (b) GCD curves of the CC/h-Co<sub>9</sub>S<sub>8</sub>/NiCo-Mo//AC HSC device at different voltages at a specific current of 10 mA·cm<sup>-2</sup>. (c) Specific discharge capacity of CC/h-Co<sub>9</sub>S<sub>8</sub>/NiCo-Mo//AC HSC device calculated from GCD curves. (d) EIS curves of the CC/h-Co<sub>9</sub>S<sub>8</sub>/NiCo-Mo//AC HSC device before and after 10000 cycles and inset showing the LED lights illuminated with CC/h-Co<sub>9</sub>S<sub>8</sub>/NiCo-Mo//AC HSC device connected in series.

**Tabal S1** Comparison of performance between electrode materials prepared in this work and other Ni/Co/Mo-based materials.

| Electrode                                           | Specific Capacity          | Specific Current        | Reference |
|-----------------------------------------------------|----------------------------|-------------------------|-----------|
| Co <sub>9</sub> S <sub>8</sub> @Ni(OH) <sub>2</sub> | 0.3 mA h·cm <sup>-2</sup>  | 2 mA·cm <sup>-2</sup>   | [1]       |
| Co <sub>9</sub> S <sub>8</sub> @Ni(OH) <sub>2</sub> | 0.45 mA h·cm <sup>-2</sup> | 0.5 mA·cm <sup>-2</sup> | [2]       |
| Co <sub>9</sub> S <sub>8</sub> NTs@NiCo LDH NSs     | 1.07 mA h·cm <sup>-2</sup> | 2 mA·cm <sup>-2</sup>   | [3]       |
| Co <sub>9</sub> S <sub>8</sub> @PPy@NiCo-LDH NTAs   | 0.74 mA h·cm <sup>-2</sup> | 1 mA cm <sup>-2</sup>   | [4]       |
| NiCo-LDH/Co <sub>9</sub> S <sub>8</sub>             | 0.95 mA h·cm <sup>-2</sup> | 7 mA·cm <sup>-2</sup>   | [5]       |
| NiMoCo-LDH                                          | 0.61 mA h·cm <sup>-2</sup> | 0.6 mA·cm <sup>-2</sup> | [6]       |
| Co(OH) <sub>2</sub> CO <sub>3</sub> @NiCo-LDH       | 0.33 mA h·cm <sup>-2</sup> | 5 mA·cm <sup>-2</sup>   | [7]       |
| NiCo-LDH                                            | 1.72 mA h·cm <sup>-2</sup> | 2 mA·cm <sup>-2</sup>   | [8]       |
| CoS <sub>2</sub> @Ni(OH) <sub>2</sub>               | 0.58 mA h·cm <sup>-2</sup> | 0.7 mA·cm <sup>-2</sup> | [9]       |
| C@MoO <sub>2</sub>                                  | 0.42 mA h·cm <sup>-2</sup> | 0.5 mA·cm <sup>-2</sup> | [10]      |
| MoO <sub>3</sub>                                    | 0.25 mA h cm <sup>-2</sup> | 1.5 mA cm <sup>-2</sup> | [11]      |
| MoO <sub>3</sub> @CuO                               | 0.86 mA h cm <sup>-2</sup> | 1 mA cm <sup>-2</sup>   | [12]      |
| MoO <sub>3</sub> /NiMoO <sub>4</sub>                | 0.8 mA h cm <sup>-2</sup>  | 2.2 mA cm <sup>-2</sup> | [13]      |
| MoO <sub>3</sub> -CNF                               | 0.15 mA h cm <sup>-2</sup> | 1 mA cm <sup>-2</sup>   | [14]      |
| MoO <sub>3</sub> /ZnMoO <sub>4</sub>                | 110 F/g                    | 0.5 A·g <sup>-1</sup>   | [15]      |
| h-Co <sub>9</sub> S <sub>8</sub> /NiCo-Mo NSAs      | 3.07 mA h·cm <sup>-2</sup> | 1 mA cm <sup>-2</sup>   | This work |

[1] F. F. Zhu, M. Yan, Y. Liu, H. Shen, Y. Lei, W. D. Shi, *J. Mater. Chem. A*, 2017, **5**, 22782.

- [2] J. Wen, S. Z. Li, B. R. Li, Z. C. Song, H. N. Wang, R. Xiong, G. J. Fang, *J. Power Sources*, 2015, **284**, 279-286.
- [3] H. N. Jia, Z. Y. Wang, X. H. Zheng, J. H. Lin, H. Y. Liang, Y. F. Cai, J. L. Qi, J. Cao, J. C. Feng, W. D. Fei, *Chem. Eng. J.*, 2018, **351**, 348-355.
- [4] L. Wang, S. K. Li, F. Z. Huang, X. Y. Yu, M. J. Liu, H. Zhang, *J. Power Sources*, 2019, **439**, 227103.
- [5] Q. J. Yang, Y. Liu, L. S. Xiao, M. Yan, H. Y. Bai, F. F. Zhu, Y. Lei, W. D. Shi, *Chem. Eng. J.*, 2018, **354**, 716-726.
- [6] H. Q. Liu, D. P. Zhao, Y. Liu, Y. L. Tong, X. Wu, G. Z. Shen, *Sci. China Mater.*, 2021, **64**, 581-591.
- [7] Y. T. Li, L. L. Wang, Y. N. Qu, B. Wang, J. G. Yu, D. D. Song, C. P. Duan, Y. Y. Yang, *Ionics*, 2020, **26**, 1397-1406.
- [8] W. R. Zou, W. X. Guo, X. Y. Liu, Y. L. Luo, Q. L. Ye, X. T. Xu, F. Wang, *Chem. Eur. J.*, 2018, **24**, 1-9.
- [9] X. Luo, J. Shao, P. He, M. Zhong, Q. Y. Wang, K. Li, W. W. Zhao, *Electrochim. Acta*, 2020, **354**, 136679.
- [10] A. Saha, A. Mondala, S. Maitib, S. C. Ghosha, S. Mahanty, A. B. Panda, *Mater. Chem. Front.*, 2017, **1**, 1585-1593.
- [11] N. Zhao, H. Q. Fan, M. C. Zhang, J. W. Ma, Z. N. Du, B. B. Yan, H. Li, X. B. Jiang, *Chem. Eng. J.*, 2020, **390**, 124477.
- [12] Y. D. Zhang, B. P. Lin, J. C. Wang, P. Han, T. Xu, Y. Sun, X. Q. Zhang, H. Yang, *Electrochim. Acta*, 2016, **191**, 795-804.
- [13] X. Y. Zhang, L. Wei, X. Guo, *Chem. Eng. J.*, 2018, **353**, 615-625.
- [14] K. Tian, L. Wei, X. Y. Zhang, Y. Y. Jin, X. Guo, *Mater. Today Energy*, 2017, **6**, 27-35.



[15] C. B. Duan, J. W. Zhao, L. R. Qin, L. J. Yang, Y. C. Zhou, *Mater. Lett.*, 2017, **208**, 65-68.
